# Supplementary material
Source: PubMed Central journal article supplement (PMC4793353)
Supplement: ferr014034.wt_default.pdf [file ferr014034.wt_default.pdf]

**Web table:** Pathological conditions that reportedly cause laughter

| <b>Condition</b>                                                                                                                                                                                                                                                                                                                                                                                                                                                                                                                   | <b>Frequency (%)*</b>   |
|------------------------------------------------------------------------------------------------------------------------------------------------------------------------------------------------------------------------------------------------------------------------------------------------------------------------------------------------------------------------------------------------------------------------------------------------------------------------------------------------------------------------------------|-------------------------|
| Epilepsy                                                                                                                                                                                                                                                                                                                                                                                                                                                                                                                           | 37                      |
| Cerebral tumours including hamartomata, cysts, malformations, vascular abnormalities, infections                                                                                                                                                                                                                                                                                                                                                                                                                                   | 25                      |
| Angelman's syndrome                                                                                                                                                                                                                                                                                                                                                                                                                                                                                                                | 9.5                     |
| Strokes                                                                                                                                                                                                                                                                                                                                                                                                                                                                                                                            | 7.0                     |
| Multiple sclerosis                                                                                                                                                                                                                                                                                                                                                                                                                                                                                                                 | 5.1                     |
| Amyotrophic lateral sclerosis/motor neuron disease                                                                                                                                                                                                                                                                                                                                                                                                                                                                                 | 4.7                     |
| Adverse drug reactions                                                                                                                                                                                                                                                                                                                                                                                                                                                                                                             | 2.0                     |
| Dementias, including Alzheimer's disease                                                                                                                                                                                                                                                                                                                                                                                                                                                                                           | 1.7                     |
| Fou rire                                                                                                                                                                                                                                                                                                                                                                                                                                                                                                                           | 1.5                     |
| Cortical dysplasia                                                                                                                                                                                                                                                                                                                                                                                                                                                                                                                 | 1.1                     |
| Pick's disease                                                                                                                                                                                                                                                                                                                                                                                                                                                                                                                     | 1.0                     |
| Infantile spasms                                                                                                                                                                                                                                                                                                                                                                                                                                                                                                                   | 0.9                     |
| Electric stimulation                                                                                                                                                                                                                                                                                                                                                                                                                                                                                                               | 0.9                     |
| Alpha-thalassaemia, Bardet–Biedl syndrome, Behçet's disease, central pontine myelinolysis, cranial nerve diseases, Creutzfeldt–Jakob disease, developmental delay, gelastic syncope, infantile spasms, involuntary emotional expression disorder, kuru, mental retardation, multiple system atrophy, paroxysmal kinesigenic dyskinesia, progressive supranuclear palsy, Rett's syndrome, succinate lyase deficiency, Tourette's syndrome, trauma, voltage-gated potassium channel antibodies, Williams' syndrome, Wilson's disease | 1–5 reported cases each |

\*1335 reported cases
